# Supplementary material for: The Prognostic Value of Eight Comorbidity Indices in Older Patients with Cancer: The ELCAPA Cohort Study
Source: MDPI journal article supplement (doi:10.3390/cancers14092236), 2022-04-29
Supplement: s1 [file s1]

Table S1. Baseline Demographic, Functional, Oncological characteristics and comorbidities according to different scores.

|              |                                 |     |       | Scores weighs |        |          |         |            |                         | NCI combined |      |          |            |      |
|--------------|---------------------------------|-----|-------|---------------|--------|----------|---------|------------|-------------------------|--------------|------|----------|------------|------|
|              |                                 |     |       | CCI           | Romano | CCI-Quan | CCI-Age | Elixhauser | CIRS-G                  | Gagne        | Sein | Prostate | Colorectal |      |
| Cancer items | Age                             |     |       |               |        |          |         |            |                         |              |      |          |            |      |
|              | < 80                            | 243 | 47,6  |               |        |          | 3       |            |                         |              |      |          |            |      |
|              | [80-90[                         | 249 | 48,8  |               |        |          | 4       |            |                         |              |      |          |            |      |
|              | ≥ 90                            | 18  | 3,5   |               |        |          | 5       |            |                         |              |      |          |            |      |
|              | Any tumor                       | 510 | 100,0 | 2             | 2      | 2        | 2       | 4          |                         | 1            |      |          |            |      |
| Conditions   | Solid cancer                    | 466 | 91,6  |               |        |          |         |            |                         |              |      |          |            |      |
|              | Lymphoma                        | 43  | 8,4   |               |        |          |         | 9          |                         |              |      |          |            |      |
|              | Metastatic cancer               | 213 | 41,8  | 6             | 6      | 6        | 6       | 12         |                         | 5            |      |          |            |      |
|              | High blood pressure             | 333 | 65,3  |               |        |          |         |            | HTA/Vascular            | -1           |      |          |            |      |
|              | Peripheral vascular disorder    | 138 | 27,1  | 1             | 1      |          | 1       | 2          | 1-4                     | 1            | 0,22 | 0,36     | 0,28       |      |
|              | Myocardial infarction           | 99  | 19,4  | 1             | 1      |          | 1       |            |                         |              | 0,40 | 0,05     | -0,19      |      |
|              | Cardiac arhythmias              | 148 | 29,0  |               |        |          |         | 5          | Heart                   | 1-4          | 1    |          |            |      |
|              | Congestive heart failure        | 72  | 14,1  | 1             | 2      | 2        | 1       | 7          |                         | 2            | 0,85 | 0,87     | 0,84       |      |
|              | Valvular disease                | 89  | 17,5  |               |        |          |         | -1         |                         |              |      |          |            |      |
|              | Pulmonary circulation disorders | 45  | 8,8   |               |        |          |         | 4          |                         | 1            |      |          |            |      |
|              | Chronic pulmonary disease       | 121 | 23,7  | 1             | 2      | 1        | 1       | 3          | Respiratory             | 1-4          | 1    | 0,47     | 0,73       | 0,47 |
|              | Cerebrovascular disease         | 49  | 9,6   | 1             | 1      |          | 1       |            |                         |              | 0,71 | 0,27     | 0,55       |      |
|              | Neurodegenerative disorders     | 93  | 18,2  |               |        |          |         | 6          | Neurological            | 1-4          |      |          |            |      |
|              | Hemiplegia                      | 10  | 2,0   | 2             | 1      | 2        | 2       |            |                         | 1            |      |          |            |      |
|              | Paralysis                       | 4   | 0,8   |               |        |          |         | 7          |                         |              | 0,21 | 0,39     | 0,30       |      |
|              | Dementia                        | 84  | 16,5  | 1             | 3      | 2        | 1       |            |                         | 2            | 1,19 | 0,78     | 0,60       |      |
|              | Depression                      | 164 | 32,2  |               |        |          |         | -3         | Psychiatry              | 1-4          |      |          |            |      |
|              | Psychosis                       | 4   | 0,8   |               |        |          |         |            |                         | 1            |      |          |            |      |
|              | Weight loss                     | 299 | 58,6  |               |        |          |         | 6          |                         | 2            |      |          |            |      |
|              | Obesity                         | 80  | 15,7  |               |        |          |         | -4         | Endocrine and metabolic |              |      |          |            |      |
|              | Uncomplicated diabete           | 67  | 13,1  | 1             | 1      |          | 1       |            | 1-4                     |              | 0,45 | 0,24     | 0,44       |      |

|                                                   |     |      |   |   |   |   |    |                |     |    |      |       |       |      |
|---------------------------------------------------|-----|------|---|---|---|---|----|----------------|-----|----|------|-------|-------|------|
| Complicated diabete                               | 51  | 10,0 | 2 | 2 | 1 | 2 |    |                |     |    | 1    | 0,02  | 0,44  | 0,30 |
| Moderate to severe renal disease                  | 285 | 55,9 | 2 | 3 | 1 | 2 | 5  | Renal          | 1-4 | 2  | 1,19 | 0,68  | 0,97  |      |
| Ulcer disease                                     | 32  | 6,3  | 1 |   |   | 1 |    |                |     |    | 0,23 | -0,25 | 0,08  |      |
| Liver disease                                     | 137 | 26,9 | 1 | 2 | 2 | 1 | 11 | Liver          | 1-4 | 1  |      |       |       |      |
| Mild liver disease                                |     |      | 3 |   | 4 | 3 |    |                |     |    |      |       |       |      |
| Blood loss anemias                                | 106 | 20,8 |   |   |   |   | -2 |                |     |    |      |       |       |      |
| Coagulopathy                                      | 71  | 13,9 |   |   |   |   | 3  | Haematological | 1-4 | 1  |      |       |       |      |
| Deficiency anemias                                | 92  | 18,0 |   |   |   |   | -2 |                |     | 1  |      |       |       |      |
| Fluid and electronic disorders                    | 62  | 12,2 |   |   |   |   | 5  |                |     | 1  |      |       |       |      |
| Rheumatoid arthritis/ collagen vascular diseases, | 22  | 4,3  | 1 |   | 1 | 1 |    |                |     |    | 0,75 | 0,09  | -0,02 |      |
| Alcohol abuse                                     | 19  | 3,7  |   |   |   |   |    |                |     | 1  |      |       |       |      |
| Drug abuse                                        | 0   | 0,0  |   |   |   |   | -7 |                |     |    |      |       |       |      |
| ENT sphere                                        |     |      |   |   |   |   |    |                | 1-4 |    |      |       |       |      |
| Lower digestive                                   |     |      |   |   |   |   |    |                | 1-4 |    |      |       |       |      |
| Upper digestive                                   |     |      |   |   |   |   |    |                | 1-4 |    |      |       |       |      |
| Musculoskeletal                                   |     |      |   |   |   |   |    |                | 1-4 |    |      |       |       |      |
| Genitourinary                                     |     |      |   |   |   |   |    |                | 1-4 |    |      |       |       |      |
| HIV/ AIDS                                         | 1   | 0,2  | 6 | 4 | 4 | 6 |    |                |     | -1 |      |       |       |      |

ADL indicates Activity Daily Living; CCI indicates Charlson Comorbidity Index
